# Supplementary material
Source: PubMed Central journal article supplement (PMC10064714)
Supplement: 12879_2023_8146_MOESM1_ESM.pdf [file 12879_2023_8146_MOESM1_ESM.pdf]

## SUPPLEMENTARY TABLES

| <b>Supplementary Table 1.</b> UHCs possibly associated with increased risk of severe COVID-19 per the United States Centers for Disease Control and Prevention and identifying ICD-10-CM codes |                                                                                                                      |                                                                  |                                                                                                                                                                                                                                                                                                                                                                                                                      |
|------------------------------------------------------------------------------------------------------------------------------------------------------------------------------------------------|----------------------------------------------------------------------------------------------------------------------|------------------------------------------------------------------|----------------------------------------------------------------------------------------------------------------------------------------------------------------------------------------------------------------------------------------------------------------------------------------------------------------------------------------------------------------------------------------------------------------------|
| <b>UHC*</b>                                                                                                                                                                                    |                                                                                                                      | <b>ICD-10-CM code<sup>†</sup></b>                                | <b>ICD-10-CM description</b>                                                                                                                                                                                                                                                                                                                                                                                         |
|                                                                                                                                                                                                | Asthma                                                                                                               | J45                                                              | Asthma                                                                                                                                                                                                                                                                                                                                                                                                               |
| *                                                                                                                                                                                              | Bronchiectasis                                                                                                       | J47                                                              | Bronchiectasis                                                                                                                                                                                                                                                                                                                                                                                                       |
|                                                                                                                                                                                                | Bronchopulmonary dysplasia                                                                                           | P27.1                                                            | Bronchopulmonary dysplasia originating in the perinatal period                                                                                                                                                                                                                                                                                                                                                       |
| *                                                                                                                                                                                              | Cancer                                                                                                               | C00-C96                                                          | Malignant neoplasms                                                                                                                                                                                                                                                                                                                                                                                                  |
| *                                                                                                                                                                                              | Cerebrovascular disease                                                                                              | I60-I69                                                          | Cerebrovascular diseases                                                                                                                                                                                                                                                                                                                                                                                             |
| *                                                                                                                                                                                              | Chronic kidney disease                                                                                               | N18                                                              | Chronic kidney disease (CKD)                                                                                                                                                                                                                                                                                                                                                                                         |
| *                                                                                                                                                                                              | Chronic obstructive pulmonary disorder                                                                               | J44                                                              | Other chronic obstructive pulmonary disease                                                                                                                                                                                                                                                                                                                                                                          |
| *                                                                                                                                                                                              | Corticosteroids or other immunosuppressive medications                                                               | D84.821; Z79.52; Z92.25                                          | Immunodeficiency due to drugs; Long term (current) use of systemic steroids; personal history of immunosuppression therapy                                                                                                                                                                                                                                                                                           |
| *                                                                                                                                                                                              | Cystic fibrosis                                                                                                      | E84                                                              | Cystic fibrosis                                                                                                                                                                                                                                                                                                                                                                                                      |
| *                                                                                                                                                                                              | Diabetes mellitus, type 1                                                                                            | E10                                                              | Type 1 diabetes mellitus                                                                                                                                                                                                                                                                                                                                                                                             |
| *                                                                                                                                                                                              | Diabetes mellitus, type 2                                                                                            | E11                                                              | Type 2 diabetes mellitus                                                                                                                                                                                                                                                                                                                                                                                             |
| *                                                                                                                                                                                              | Down syndrome                                                                                                        | Q90                                                              | Down syndrome                                                                                                                                                                                                                                                                                                                                                                                                        |
| *                                                                                                                                                                                              | Heart conditions (e.g., heart failure, coronary artery disease, cardiomyopathies)                                    | I20-I25; I30-I52                                                 | Ischemic heart disease; Other forms of heart disease                                                                                                                                                                                                                                                                                                                                                                 |
| *                                                                                                                                                                                              | Human immunodeficiency virus                                                                                         | B20; Z21                                                         | Human immunodeficiency virus (HIV) disease; Asymptomatic human immunodeficiency virus (HIV) infection status                                                                                                                                                                                                                                                                                                         |
|                                                                                                                                                                                                | Hypertension                                                                                                         | I10                                                              | Essential (primary) hypertension                                                                                                                                                                                                                                                                                                                                                                                     |
| *                                                                                                                                                                                              | Immune deficiencies                                                                                                  | D80; D81; D82; D83; D84.0; D84.1; D84.81; D84.822; D84.89; D84.9 | Immunodeficiency with predominantly antibody defects; Combined immunodeficiencies; Immunodeficiency associated with other major defects; Common variable immunodeficiency; Lymphocyte function antigen-1 [LFA-1] defect; Defects in the complement system; Immunodeficiency due to conditions classified elsewhere; Immunodeficiency due to external causes; Other immunodeficiencies; Immunodeficiency, unspecified |
| *                                                                                                                                                                                              | Liver disease, chronic (cirrhosis, non-alcoholic fatty liver disease, alcoholic liver disease, autoimmune hepatitis) | K70-K77                                                          | Diseases of liver                                                                                                                                                                                                                                                                                                                                                                                                    |
| *                                                                                                                                                                                              | Lung disease, interstitial                                                                                           | J80-J84                                                          | Other respiratory diseases principally affecting the interstitium                                                                                                                                                                                                                                                                                                                                                    |
| *                                                                                                                                                                                              | Lung disease, other                                                                                                  | I28; J41; J42; J43; J60-J70; J85-J86; J90-J94; Z99.81            | Other diseases of pulmonary vessels; Simple and mucopurulent chronic bronchitis; Unspecified chronic bronchitis; Emphysema; Lung diseases due to external agents; Suppurative and necrotic conditions of the lower respiratory tract; Other diseases of the pleura; Dependence on supplemental oxygen                                                                                                                |
| *                                                                                                                                                                                              | Mental health disorders (mood disorders, e.g., depression and schizophrenia spectrum disorders)                      | F20-F29; F30-F39                                                 | Schizophrenia, schizotypal, delusional, and other non-mood psychotic disorders; Mood (affective) disorders                                                                                                                                                                                                                                                                                                           |
| *                                                                                                                                                                                              | Neurologic conditions                                                                                                | F01; F02; F03; G10-G14; G20; G30-G32; G35; G45; G70; G80-G83     | Vascular dementia; Dementia in other diseases classified elsewhere; Unspecified dementia; Systemic atrophies primarily affecting the central nervous system; Parkinson's disease; Other degenerative diseases of the nervous system; Multiple sclerosis; Transient cerebral ischemic attacks and related syndromes; Myasthenia gravis and other myoneural disorders; Cerebral palsy and other paralytic syndromes    |
| *                                                                                                                                                                                              | Obesity (BMI $\geq 30\text{kg/m}^2$ ) <sup>‡</sup>                                                                   | E66.0; E66.1; E66.2; E66.8; E66.9                                | Obesity due to excessive calories; Drug-induced obesity; Morbid (severe) obesity with alveolar hypoventilation; Other obesity; Obesity, unspecified                                                                                                                                                                                                                                                                  |

**Supplementary Table 1.** UHCs possibly associated with increased risk of severe COVID-19 per the United States Centers for Disease Control and Prevention and identifying ICD-10-CM codes

| UHC* |                                                           | ICD-10-CM code <sup>†</sup>       | ICD-10-CM description                                                                                                                                                                                                                                                                                          |
|------|-----------------------------------------------------------|-----------------------------------|----------------------------------------------------------------------------------------------------------------------------------------------------------------------------------------------------------------------------------------------------------------------------------------------------------------|
|      | Overweight (BMI $25 \geq 29 \text{kg/m}^2$ ) <sup>‡</sup> | E66.3                             | Overweight                                                                                                                                                                                                                                                                                                     |
| *    | Pregnancy and recent pregnancy                            | Z33; Z34; Z36; Z37; Z38; Z39; Z3A | Pregnant state; Encounter for supervision of normal pregnancy; Encounter for antenatal screening of mother; Outcome of delivery; Liveborn infants according to place of birth and type of delivery; Encounter for maternal postpartum care and examination; Weeks of gestation                                 |
| *    | Pulmonary hypertension and pulmonary embolism             | I26; I27                          | Pulmonary embolism; Other pulmonary heart disease                                                                                                                                                                                                                                                              |
|      | Sickle cell disease                                       | D57                               | Sickle-cell disorders                                                                                                                                                                                                                                                                                          |
| *    | Smoking, current and former <sup>‡</sup>                  | F17; Z72.0; Z87.891               | Nicotine dependence; Tobacco use; Personal history of nicotine dependence                                                                                                                                                                                                                                      |
| *    | Solid organ or blood stem cell transplantation            | Z94; T86                          | Transplanted organ and tissue status; Complications of transplanted organs and tissue                                                                                                                                                                                                                          |
|      | Substance use disorders                                   | F10-F16; F18; F19                 | Alcohol related disorders; Opioid related disorders; Cannabis related disorders; Sedative, hypnotic, or anxiolytic related disorders; Cocaine related disorders; Other stimulant related disorders; Hallucinogen related disorders; Inhalant related disorders; Other psychoactive substance related disorders |
|      | Thalassemia                                               | D56                               | Thalassemia                                                                                                                                                                                                                                                                                                    |
| *    | Tuberculosis                                              | A15                               | Respiratory tuberculosis                                                                                                                                                                                                                                                                                       |

UHC=underlying health condition, ICD-10-CM=international classification of disease, tenth revision, clinical modification, COVID-19=coronavirus disease 2019, BMI=body mass index

\*UHCs for which there is a published meta-analysis or systematic review demonstrating a conclusive increase in risk of severe COVID-19 according to the United States Centers for Disease Control and Prevention [1] are marked with an asterisk

<sup>†</sup>ICD-10-CM codes and other electronic health record (EHR) data for all underlying health conditions were evaluated from 01/01/2017 to the date of the first positive reverse transcription polymerase chain reaction (RT-PCR) test for severe acute respiratory syndrome coronavirus 2 (SARS-CoV-2), except those for pregnancy and recent pregnancy, which were evaluated for the 60 days prior to the date of the first positive RT-PCR test for SARS-CoV-2

<sup>‡</sup>In addition to the ICD-10-CM codes indicated, EHR height and weight data were used to calculate BMI to identify patients with overweight and obesity, and EHR smoking data were used to identify patients with a history of smoking. BMI was based on the most recent encounter between 01/01/2017 and the date of the first positive SARS-CoV-2 RT-PCR test for which height, weight, and the calculated BMI were biologically plausible. Biological plausibility for height was defined as  $\geq 1.2\text{m}$  and  $\leq 2.4\text{m}$ , for weight as  $\geq 34.0\text{kg}$  and  $\leq 272.2\text{kg}$ , and for BMI as  $\leq 80.0\text{kg/m}^2$  [2]. Patients who had a smoking status of current or former smoker recorded at any encounter between 01/01/2017 and the date of the first positive SARS-CoV-2 RT-PCR test were classified as current or former smokers in our analyses

**Supplementary Table 2.** Distribution of UHCs among patients with a positive SARS-CoV-2 RT-PCR test, by age group, University of Washington Medicine healthcare system, February 29, 2020-March 13, 2021

| UHC*                                                     | Total<br>N = 7,452 |      | 18-39 years <sup>†</sup><br>N = 3,249 |      | 40-64 years <sup>†</sup><br>N = 2,840 |      | 65+ years <sup>†</sup><br>N = 1,363 |      |
|----------------------------------------------------------|--------------------|------|---------------------------------------|------|---------------------------------------|------|-------------------------------------|------|
|                                                          | n                  | %    | n                                     | %    | n                                     | %    | n                                   | %    |
| None                                                     | 2,111              | 28.3 | 1,380                                 | 42.5 | 586                                   | 20.6 | 145                                 | 10.6 |
| Asthma                                                   | 499                | 6.7  | 181                                   | 5.6  | 205                                   | 7.2  | 113                                 | 8.3  |
| * Bronchiectasis                                         | 42                 | 0.6  | 2                                     | 0.1  | 14                                    | 0.5  | 26                                  | 1.9  |
| Bronchopulmonary dysplasia                               | 0                  | 0.0  | 0                                     | 0.0  | 0                                     | 0.0  | 0                                   | 0.0  |
| * Cancer                                                 | 412                | 5.5  | 48                                    | 1.5  | 156                                   | 5.5  | 208                                 | 15.3 |
| * Cerebrovascular disease                                | 346                | 4.6  | 26                                    | 0.8  | 117                                   | 4.1  | 203                                 | 14.9 |
| * Chronic kidney disease                                 | 418                | 5.6  | 31                                    | 1.0  | 157                                   | 5.5  | 230                                 | 16.9 |
| * Chronic obstructive pulmonary disorder                 | 229                | 3.1  | 2                                     | 0.1  | 89                                    | 3.1  | 138                                 | 10.1 |
| * Corticosteroids or other immunosuppressive medications | 106                | 1.4  | 19                                    | 0.6  | 53                                    | 1.9  | 34                                  | 2.5  |
| * Cystic fibrosis                                        | 3                  | <0.1 | 2                                     | 0.1  | 1                                     | <0.1 | 0                                   | 0.0  |
| * Diabetes mellitus, type 1                              | 78                 | 1.0  | 27                                    | 0.8  | 38                                    | 1.3  | 13                                  | 1.0  |
| * Diabetes mellitus, type 2                              | 954                | 12.8 | 79                                    | 2.4  | 489                                   | 17.2 | 386                                 | 28.3 |
| * Down syndrome                                          | 12                 | 0.2  | 3                                     | 0.1  | 9                                     | 0.3  | 0                                   | 0.0  |
| * Heart conditions                                       | 1,009              | 13.5 | 87                                    | 2.7  | 373                                   | 13.1 | 549                                 | 40.3 |
| * Human immunodeficiency virus                           | 119                | 1.6  | 27                                    | 0.8  | 81                                    | 2.9  | 11                                  | 0.8  |
| Hypertension                                             | 1,729              | 23.2 | 131                                   | 4.0  | 837                                   | 29.5 | 761                                 | 55.8 |
| * Immune deficiencies                                    | 37                 | 0.5  | 4                                     | 0.1  | 19                                    | 0.7  | 14                                  | 1.0  |
| * Liver disease, chronic                                 | 371                | 5.0  | 56                                    | 1.7  | 204                                   | 7.2  | 111                                 | 8.1  |
| * Lung disease, interstitial                             | 182                | 2.4  | 12                                    | 0.4  | 86                                    | 3.0  | 84                                  | 6.2  |
| * Lung disease, other                                    | 425                | 5.7  | 44                                    | 1.4  | 175                                   | 6.2  | 206                                 | 15.1 |
| * Mental health disorders                                | 1,217              | 16.3 | 389                                   | 12.0 | 514                                   | 18.1 | 314                                 | 23.0 |
| * Neurologic conditions                                  | 555                | 7.4  | 39                                    | 1.2  | 144                                   | 5.1  | 372                                 | 27.3 |
| * Obesity (BMI ≥30kg/m <sup>2</sup> )                    | 1,935              | 26.0 | 603                                   | 18.6 | 960                                   | 33.8 | 372                                 | 27.3 |
| Overweight (BMI 25≥29kg/m <sup>2</sup> )                 | 1,803              | 24.2 | 683                                   | 21.0 | 749                                   | 26.4 | 371                                 | 27.2 |
| * Pregnancy and recent pregnancy                         | 49                 | 0.7  | 48                                    | 1.5  | 1                                     | <0.1 | 0                                   | 0.0  |
| * Pulmonary hypertension and pulmonary embolism          | 174                | 2.3  | 20                                    | 0.6  | 75                                    | 2.6  | 79                                  | 5.8  |
| Sickle cell disease                                      | 10                 | 0.1  | 7                                     | 0.2  | 3                                     | 0.1  | 0                                   | 0.0  |
| * Smoking, current and former                            | 1,937              | 26.0 | 564                                   | 17.4 | 859                                   | 30.2 | 514                                 | 37.7 |
| * Solid organ or blood stem cell transplantation         | 108                | 1.4  | 18                                    | 0.6  | 49                                    | 1.7  | 41                                  | 3.0  |
| Substance use disorders                                  | 609                | 8.2  | 209                                   | 6.4  | 307                                   | 10.8 | 93                                  | 6.8  |
| Thalassemia                                              | 10                 | 0.1  | 5                                     | 0.2  | 5                                     | 0.2  | 0                                   | 0.0  |
| * Tuberculosis                                           | 16                 | 0.2  | 5                                     | 0.2  | 7                                     | 0.2  | 4                                   | 0.3  |

UHC=underlying health condition, SARS-CoV-2=severe acute respiratory syndrome coronavirus 2, RT-PCR=reverse transcription polymerase chain reaction, BMI=body mass index

Columns may sum to greater than 100% due to overlapping health conditions

\*Conditions possibly associated with increased risk of severe coronavirus disease 2019 (COVID-19) per the United States Centers for Disease Control and Prevention [1]; UHCs for which there is a published meta-analysis or systematic review demonstrating a conclusive increase in risk of severe COVID-19 are marked with an asterisk

<sup>†</sup>Age at first positive SARS-CoV-2 RT-PCR test within University of Washington Medicine

**Supplementary Table 3.** Risks, risk ratios, and risk differences of COVID-19-associated hospitalization by presence of any UHC among patients with a positive SARS-CoV-2 RT-PCR test, overall and by age group, University of Washington Medicine healthcare system, February 29, 2020-March 13, 2021

| Age group (years)* | Any UHC <sup>†</sup> | Risk of COVID-19 hospitalization <sup>‡</sup> |      | Crude RR |           | Adjusted RR <sup>§</sup> |           | Crude RD <sup>  </sup> |         | Adjusted RD <sup>§  </sup> |         |
|--------------------|----------------------|-----------------------------------------------|------|----------|-----------|--------------------------|-----------|------------------------|---------|----------------------------|---------|
|                    |                      | n/N                                           | %    | RR       | 95% CI    | aRR                      | 95% CI    | RD                     | 95% CI  | aRD                        | 95% CI  |
| 18-39              | Yes                  | 42 / 1,869                                    | 2.2  | 5.2      | 2.2, 12.1 | 4.3                      | 1.8, 10.0 | 18                     | 11, 26  | 10                         | 2, 18   |
|                    | No                   | 6 / 1,380                                     | 0.4  | Referent |           | Referent                 |           | Referent               |         | Referent                   |         |
| 40-64              | Yes                  | 126 / 2,254                                   | 5.6  | 16.4     | 4.1, 66.1 | 12.9                     | 3.2, 52.5 | 52                     | 42, 63  | 43                         | 33, 54  |
|                    | No                   | 2 / 586                                       | 0.3  | Referent |           | Referent                 |           | Referent               |         | Referent                   |         |
| 65+                | Yes                  | 149 / 1,218                                   | 12.2 | 4.4      | 1.7, 11.8 | 3.1                      | 1.2, 8.2  | 95                     | 62, 127 | 84                         | 51, 116 |
|                    | No                   | 4 / 145                                       | 2.8  | Referent |           | Referent                 |           | Referent               |         | Referent                   |         |
| Total              | Yes                  | 317 / 5,341                                   | 5.9  | 10.4     | 5.9, 18.5 | 5.3                      | 3.0, 9.6  | 54                     | 47, 61  | 28                         | 21, 35  |
|                    | No                   | 12 / 2,111                                    | 0.6  | Referent |           | Referent                 |           | Referent               |         | Referent                   |         |

COVID-19=coronavirus disease 2019, UHC=underlying health condition, SARS-CoV-2=severe acute respiratory syndrome coronavirus 2, RT-PCR=reverse transcription polymerase chain reaction, (a)RR=(adjusted) risk ratio, (a)RD=(adjusted) risk difference, CI=confidence interval  
 RRs estimated by log-binomial regression using Huber-White estimates of the standard error; RDs estimated using a generalized linear model with a Gaussian distribution and identity link function, and using Huber-White estimates of the standard error  
 Analysis of variance used to test for interaction by age group (aRR: p-value=0.2; aRD: p-value<0.001)

\*Age at first positive SARS-CoV-2 RT-PCR test within University of Washington Medicine

<sup>†</sup>Conditions possibly associated with increased risk of severe COVID-19 per the United States Centers for Disease Control and Prevention [1], (all yes/no) based on electronic health record data; see Supplementary Table 1 for list of conditions

<sup>‡</sup>An indicator variable of COVID-19-associated hospitalization within University of Washington Medicine

<sup>§</sup>Adjusted for continuous age (years), sex assigned at birth (female/male), race and ethnicity (Hispanic or Latine, non-Hispanic American Indian or Alaska Native, non-Hispanic Asian, non-Hispanic Black, non-Hispanic Native Hawaiian or Pacific Islander, non-Hispanic White, not recorded), and health insurance status (public, private, uninsured, not recorded); total models also adjusted for age group (18-39, 40-64, 65+ years)

<sup>||</sup>Difference in cumulative incidence per 1,000 SARS-CoV-2-positive persons over the 13-month study period

**Supplementary Table 4.** Risks, risk ratios, and risk differences of COVID-19-associated hospitalization by presence of any UHC among patients with a positive SARS-CoV-2 RT-PCR test, overall and by age group, University of Washington Medicine healthcare system, February 29, 2020-December 10, 2020

| Age group (years)* | Any UHC <sup>†</sup> | Risk of COVID-19 hospitalization <sup>‡</sup> |      | Crude RR |            | Adjusted RR <sup>§</sup> |            | Crude RD <sup>  </sup> |         | Adjusted RD <sup>§  </sup> |         |
|--------------------|----------------------|-----------------------------------------------|------|----------|------------|--------------------------|------------|------------------------|---------|----------------------------|---------|
|                    |                      | n/N                                           | %    | RR       | 95% CI     | aRR                      | 95% CI     | RD                     | 95% CI  | aRD                        | 95% CI  |
| 18-39              | Yes                  | 39 / 1,602                                    | 2.4  | 5.1      | 2.2, 12.0  | 4.1                      | 1.7, 9.7   | 20                     | 11, 28  | 11                         | 3, 20   |
|                    | No                   | 6 / 1,257                                     | 0.5  | Referent |            | Referent                 |            | Referent               |         | Referent                   |         |
| 40-64              | Yes                  | 100 / 1,825                                   | 5.5  | 27.1     | 3.8, 193.7 | 21.6                     | 3.0, 155.2 | 53                     | 42, 64  | 44                         | 33, 56  |
|                    | No                   | 1 / 494                                       | 0.2  | Referent |            | Referent                 |            | Referent               |         | Referent                   |         |
| 65+                | Yes                  | 111 / 996                                     | 11.1 | 4.5      | 1.5, 14.1  | 3.4                      | 1.1, 10.4  | 87                     | 53, 121 | 77                         | 43, 111 |
|                    | No                   | 3 / 122                                       | 2.5  | Referent |            | Referent                 |            | Referent               |         | Referent                   |         |
| Total              | Yes                  | 250 / 4,423                                   | 5.7  | 10.6     | 5.6, 19.9  | 5.7                      | 3.0, 10.7  | 51                     | 44, 59  | 28                         | 21, 35  |
|                    | No                   | 10 / 1,873                                    | 0.5  | Referent |            | Referent                 |            | Referent               |         | Referent                   |         |

COVID-19=coronavirus disease 2019, UHC=underlying health condition, SARS-CoV-2=severe acute respiratory syndrome coronavirus 2, RT-PCR=reverse transcription polymerase chain reaction, (a)RR=(adjusted) risk ratio, (a)RD=(adjusted) risk difference, CI=confidence interval  
 RRs estimated by log-binomial regression using Huber-White estimates of the standard error; RDs estimated using a generalized linear model with a Gaussian distribution and identity link function, and using Huber-White estimates of the standard error  
 Analysis of variance used to test for interaction by age group (aRR: p-value=0.1; aRD: p-value<0.001)

\*Age at first positive SARS-CoV-2 RT-PCR test within University of Washington Medicine

<sup>†</sup>Conditions possibly associated with increased risk of severe COVID-19 per the United States Centers for Disease Control and Prevention [1], (all yes/no) based on electronic health record data; see Supplementary Table 1 for list of conditions

<sup>‡</sup>An indicator variable of COVID-19-associated hospitalization within University of Washington Medicine

<sup>§</sup>Adjusted for continuous age (years), sex assigned at birth (female/male), race and ethnicity (Hispanic or Latine, non-Hispanic American Indian or Alaska Native, non-Hispanic Asian, non-Hispanic Black, non-Hispanic Native Hawaiian or Pacific Islander, non-Hispanic White, not recorded), and health insurance status (public, private, uninsured, not recorded); total models also adjusted for age group (18-39, 40-64, 65+ years)

<sup>||</sup>Difference in cumulative incidence per 1,000 SARS-CoV-2-positive persons over the 13-month study period

**Supplementary Table 5.** Risks, risk ratios, and risk differences of COVID-19-associated hospitalization by presence of any UHC among patients with a positive SARS-CoV-2 RT-PCR test, overall and by age group, University of Washington Medicine healthcare system, July 1, 2020-October 31, 2020

| Age group (years)* | Any UHC <sup>†</sup> | Risk of COVID-19 hospitalization <sup>‡</sup> |     | Crude RR |           | Adjusted RR <sup>§</sup> |           | Crude RD <sup>  </sup> |         | Adjusted RD <sup>§  </sup> |         |
|--------------------|----------------------|-----------------------------------------------|-----|----------|-----------|--------------------------|-----------|------------------------|---------|----------------------------|---------|
|                    |                      | n/N                                           | %   | RR       | 95% CI    | aRR                      | 95% CI    | RD                     | 95% CI  | aRD                        | 95% CI  |
| 18-39              | Yes                  | 16 / 640                                      | 2.5 | 6.4      | 1.5, 27.7 | 4.9                      | 1.2, 19.9 | 21                     | 8, 34   | 13                         | 0, 26   |
|                    | No                   | 2 / 511                                       | 0.4 | Referent |           | Referent                 |           | Referent               |         | Referent                   |         |
| 40-64              | Yes                  | 28 / 583                                      | 4.8 | 8.5      | 1.2, 61.9 | 7.0                      | 0.9, 52.5 | 42                     | 22, 63  | 36                         | 15, 57  |
|                    | No                   | 1 / 176                                       | 0.6 | Referent |           | Referent                 |           | Referent               |         | Referent                   |         |
| 65+                | Yes                  | 21 / 237                                      | 8.9 | 3.2      | 0.4, 23.1 | 2.5                      | 0.4, 16.6 | 61                     | -4, 126 | 55                         | -9, 119 |
|                    | No                   | 1 / 36                                        | 2.8 | Referent |           | Referent                 |           | Referent               |         | Referent                   |         |
| Total              | Yes                  | 65 / 1,460                                    | 4.5 | 8.0      | 2.9, 22.0 | 4.8                      | 1.8, 13.0 | 39                     | 27, 51  | 23                         | 11, 34  |
|                    | No                   | 4 / 723                                       | 0.6 | Referent |           | Referent                 |           | Referent               |         | Referent                   |         |

COVID-19=coronavirus disease 2019, UHC=underlying health condition, SARS-CoV-2=severe acute respiratory syndrome coronavirus 2, RT-PCR=reverse transcription polymerase chain reaction, (a)RR=(adjusted) risk ratio, (a)RD=(adjusted) risk difference, CI=confidence interval  
 RRs estimated by log-binomial regression using Huber-White estimates of the standard error; RDs estimated using a generalized linear model with a Gaussian distribution and identity link function, and using Huber-White estimates of the standard error  
 Analysis of variance used to test for interaction by age group (aRR: p-value=0.8; aRD: p-value=0.2)

\*Age at first positive SARS-CoV-2 RT-PCR test within University of Washington Medicine

<sup>†</sup>Conditions possibly associated with increased risk of severe COVID-19 per the United States Centers for Disease Control and Prevention [1], (all yes/no) based on electronic health record data; see Supplementary Table 1 for list of conditions

<sup>‡</sup>An indicator variable of COVID-19-associated hospitalization within University of Washington Medicine

<sup>§</sup>Adjusted for continuous age (years), sex assigned at birth (female/male), race and ethnicity (Hispanic or Latine, non-Hispanic American Indian or Alaska Native, non-Hispanic Asian, non-Hispanic Black, non-Hispanic Native Hawaiian or Pacific Islander, non-Hispanic White, not recorded), and health insurance status (public, private, uninsured, not recorded); total models also adjusted for age group (18-39, 40-64, 65+ years)

<sup>||</sup>Difference in cumulative incidence per 1,000 SARS-CoV-2-positive persons over the 13-month study period

**Supplementary Table 6.** Risks, risk ratios, and risk differences of COVID-19-associated hospitalization by presence of any UHC among patients with a positive SARS-CoV-2 RT-PCR test, overall and by age group, University of Washington Medicine healthcare system, February 29, 2020-March 13, 2021

| Age group (years)* | Any UHC† | Risk of COVID-19 hospitalization‡ |      | Crude RR |           | Adjusted RR§ |           | Crude RD |         | Adjusted RD§ |         |
|--------------------|----------|-----------------------------------|------|----------|-----------|--------------|-----------|----------|---------|--------------|---------|
|                    |          | n/N                               | %    | RR       | 95% CI    | aRR          | 95% CI    | RD       | 95% CI  | aRD          | 95% CI  |
| 18-39              | Yes      | 38 / 1,362                        | 2.8  | 5.3      | 2.6, 10.5 | 4.2          | 2.1, 8.5  | 23       | 13, 32  | 14           | 4, 24   |
|                    | No       | 10 / 1,887                        | 0.5  | Referent |           | Referent     |           | Referent |         | Referent     |         |
| 40-64              | Yes      | 122 / 1,923                       | 6.3  | 9.7      | 4.3, 21.9 | 7.8          | 3.5, 17.7 | 57       | 45, 69  | 48           | 36, 60  |
|                    | No       | 6 / 917                           | 0.7  | Referent |           | Referent     |           | Referent |         | Referent     |         |
| 65+                | Yes      | 143 / 1,133                       | 12.6 | 2.9      | 1.6, 5.4  | 2.2          | 1.2, 4.1  | 83       | 50, 115 | 73           | 40, 106 |
|                    | No       | 10 / 230                          | 4.3  | Referent |           | Referent     |           | Referent |         | Referent     |         |
| Total              | Yes      | 303 / 4,418                       | 6.9  | 8.0      | 5.4, 11.9 | 4.2          | 2.8, 6.4  | 60       | 52, 68  | 34           | 26, 42  |
|                    | No       | 26 / 3,034                        | 0.9  | Referent |           | Referent     |           | Referent |         | Referent     |         |

COVID-19=coronavirus disease 2019, UHC=underlying health condition, SARS-CoV-2=severe acute respiratory syndrome coronavirus 2, RT-PCR=reverse transcription polymerase chain reaction, (a)RR=(adjusted) risk ratio, (a)RD=(adjusted) risk difference, CI=confidence interval  
 RRs estimated by log-binomial regression using Huber-White estimates of the standard error; RDs estimated using a generalized linear model with a Gaussian distribution and identity link function, and using Huber-White estimates of the standard error  
 Analysis of variance used to test for interaction by age group (aRR: p-value=0.04; aRD: p-value<0.001)

\*Age at first positive SARS-CoV-2 RT-PCR test within University of Washington Medicine

†Conditions conclusively associated with increased risk of severe COVID-19 per the United States Centers for Disease Control and Prevention [1], (all yes/no) based on electronic health record data; see Supplementary Table 1 for list of conditions

‡An indicator variable of COVID-19-associated hospitalization within University of Washington Medicine

§Adjusted for continuous age (years), sex assigned at birth (female/male), race and ethnicity (Hispanic or Latine, non-Hispanic American Indian or Alaska Native, non-Hispanic Asian, non-Hispanic Black, non-Hispanic Native Hawaiian or Pacific Islander, non-Hispanic White, not recorded), and health insurance status (public, private, uninsured, not recorded); total models also adjusted for age group (18-39, 40-64, 65+ years)

||Difference in cumulative incidence per 1,000 SARS-CoV-2-positive persons over the 13-month study period

## REFERENCES

1. COVID-19 - Underlying Medical Conditions. Centers for Disease Control and Prevention. 2022. <https://www.cdc.gov/coronavirus/2019-ncov/science/science-briefs/underlying-evidence-table.html>. Accessed 16 Mar 2022.
2. Littman AJ, Boyko EJ, McDonell MB, Fihn SD. Evaluation of a Weight Management Program for Veterans. *Prev Chronic Dis.* 2012;9:110267.
